# Supplementary material for: Process-related impurities in the ChAdOx1 nCov-19 vaccine
Source: Research Square preprint supplement (doi:10.21203/rs.3.rs-477964/v1), 2021-05-04
Supplement: Supplementary file 1 [file 6c434610af722cd3566a20ca.xlsx]

## Sheet: ABV5811
	Protein name	Protein ID	Gene name	Intensity	% Intensity
	Heat shock protein HSP 90-beta	P08238	HSP90AB1	21470000000	9.39119
	100K	YP_006272966.1_18	db_xref=GeneID:12657121	15467000000	6.76542
	Hexon	YP_006272963.1_15	db_xref=GeneID:12657118	13836000000	6.052
	Transitional endoplasmic reticulum ATPase	P55072	VCP	9666900000	4.2284
	Heat shock protein HSP 90-alpha	P07900	HSP90AA1	9094100000	3.97785
	Vimentin	P08670	VIM	7376200000	3.22642
	Tubulin beta-4B chain	P68371	TUBB4B	6456100000	2.82396
	Tubulin alpha-1B chain	P68363	TUBA1B	5916700000	2.58802
	IIIa	YP_006272957.1_9	db_xref=GeneID:12657143	5459200000	2.38791
	VII	YP_006272959.1_11	db_xref=GeneID:12657145	5412800000	2.36761
	14-3-3 protein epsilon	P62258	YWHAE	5246800000	2.295
	VI	YP_006272962.1_14	db_xref=GeneID:12657117	4504400000	1.97027
	V	YP_006272960.1_12	db_xref=GeneID:12657115	3951000000	1.72821
	Endoplasmin	P14625	HSP90B1	3787700000	1.65678
	DBP	YP_006272965.1_17	db_xref=GeneID:12657120	3567500000	1.56046
	Penton base	YP_006272958.1_10	db_xref=GeneID:12657144	3421200000	1.49647
	52/55kDa	YP_006272956.1_8	db_xref=GeneID:12657142	3115200000	1.36262
	Alpha-actinin-4	O43707	ACTN4	3087500000	1.3505
	Calreticulin	P27797	CALR	2760500000	1.20747
	Galectin-3-binding protein	Q08380	LGALS3BP	2682300000	1.17326
	Actin, cytoplasmic 2	P63261	ACTG1	2464300000	1.07791
	Glyceraldehyde-3-phosphate dehydrogenase	P04406	GAPDH	2200900000	0.962696
	IVa2	YP_006272953.1_5	db_xref=GeneID:12657139	2001900000	0.875651
	IX	YP_006272952.1_4	db_xref=GeneID:12657138	1926500000	0.84267
	VIII	YP_006272969.1_21	db_xref=GeneID:12657124	1698700000	0.743028
	Elongation factor 1-alpha 1	P68104	EEF1A1	1644600000	0.719364
	Nuclear autoantigenic sperm protein	P49321	NASP	1609600000	0.704055
	60S acidic ribosomal protein P0	P05388	RPLP0	1606200000	0.702568
	14-3-3 protein zeta/delta	P63104	YWHAZ	1468600000	0.64238
	Protein disulfide-isomerase	P07237	P4HB	1435600000	0.627946
